# Supplementary material
Source: MDPI journal article supplement (https://www.mdpi.com/2071-1050/15/1/536)

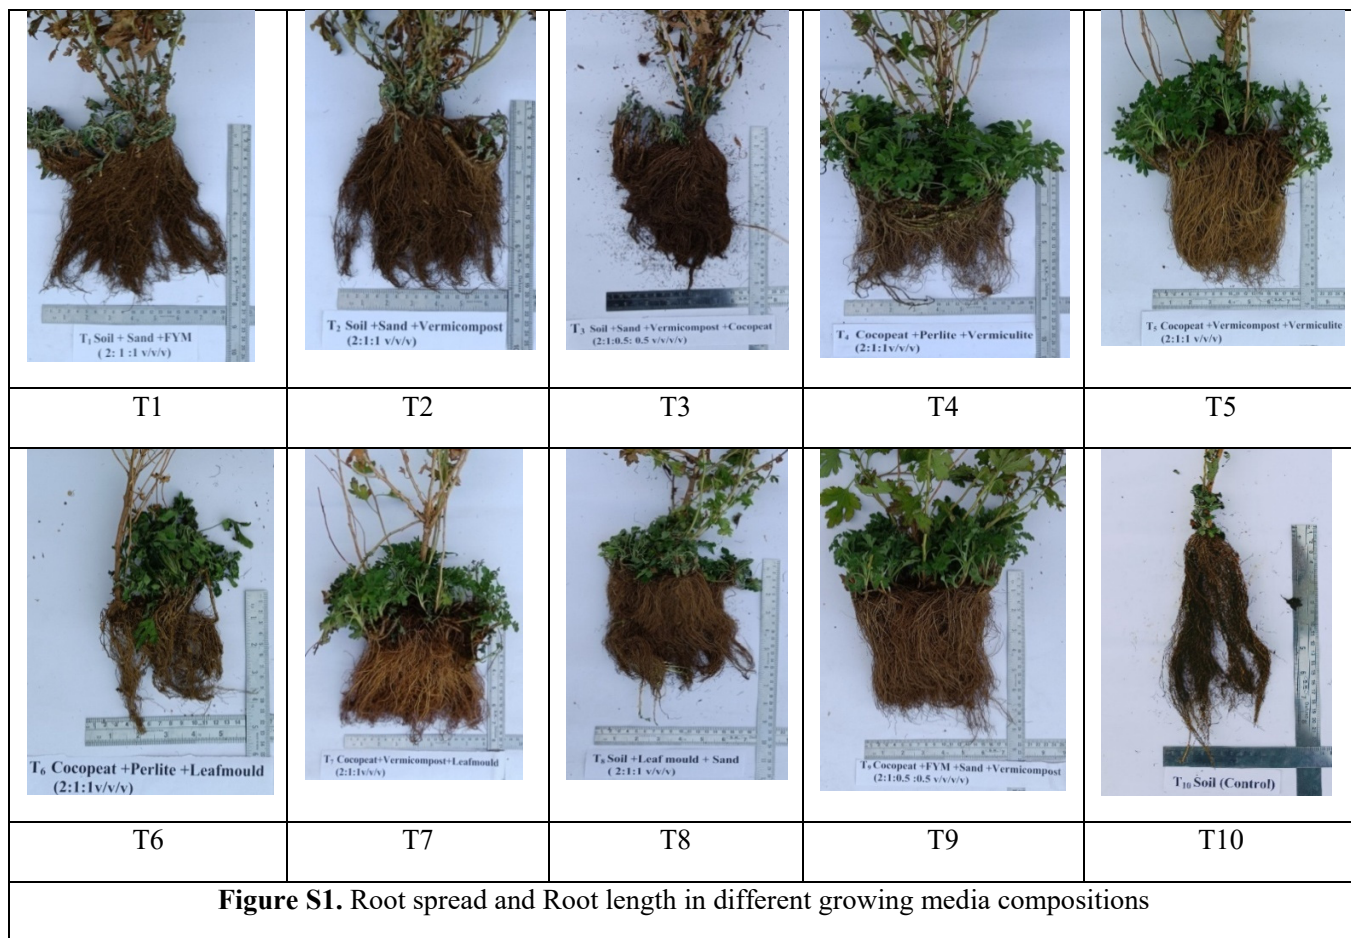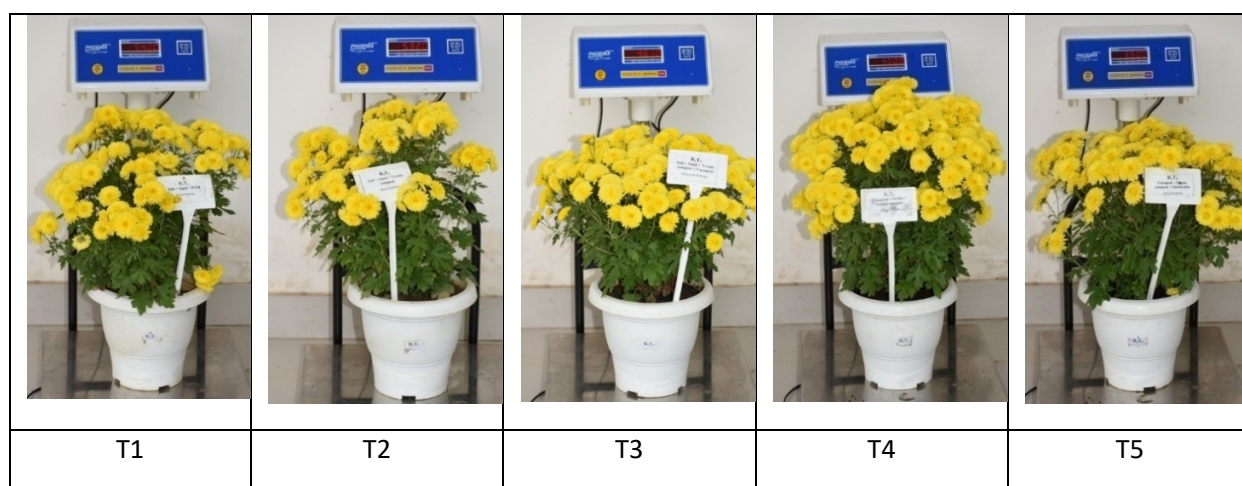

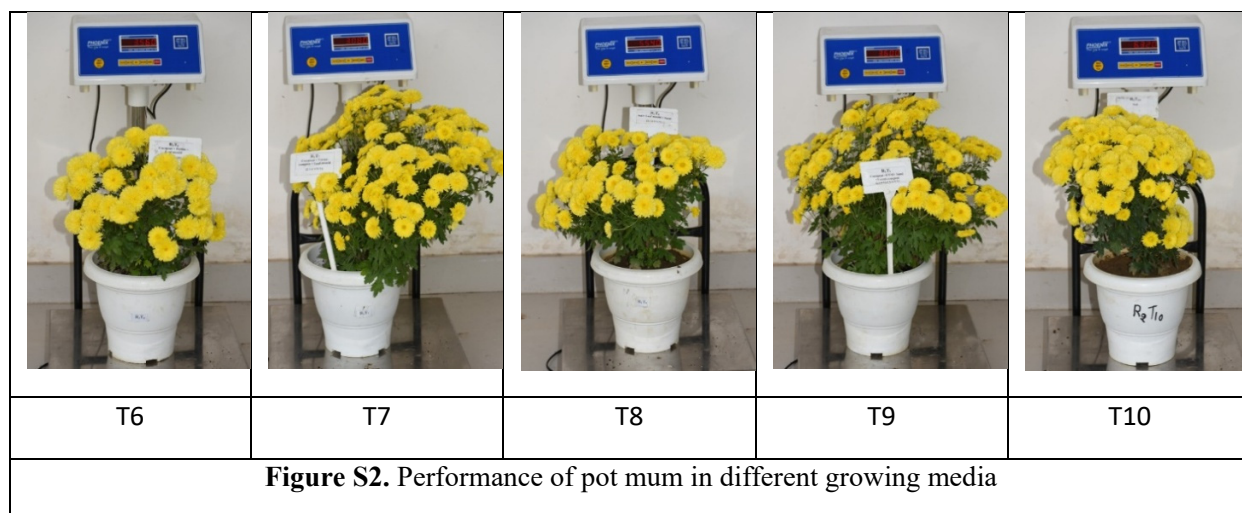

Supplement: s1 [file s1 › sustainability-2100082-supplementary.pdf]
